# Supplementary material for: A high-performance platinum electrocatalyst loaded on a graphene hydrogel for high-rate methanol oxidation
Source: Royal Society of Chemistry journal article supplement (doi:10.1039/c3cp54058h), 2014-01-01
Supplement: c3cp54058h.pdf [file c3cp54058h.pdf]

Supporting online materials for

## **A high-performance platinum electrocatalyst loaded on graphene hydrogel for high-rate methanol oxidation**

**Xiluan Wang, Chun Li & Gaoquan Shi\***

*Department of Chemistry, Tsinghua University, Beijing 100084, People's Republic of China. \*e-mail:gshi@tsinghua.edu.cn*

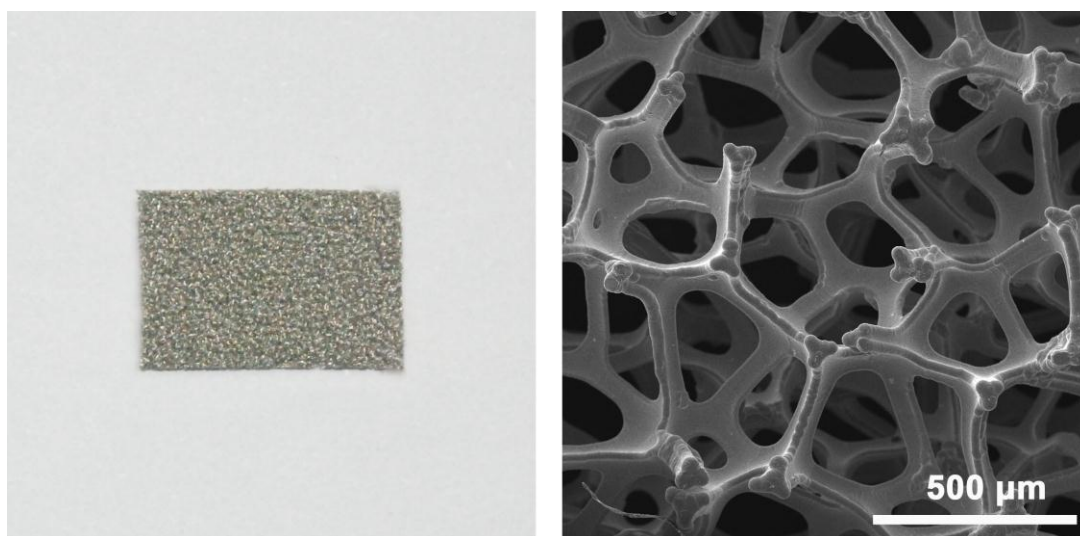

**Fig. S1** The photograph and cross-sectional SEM image of a neat NF.

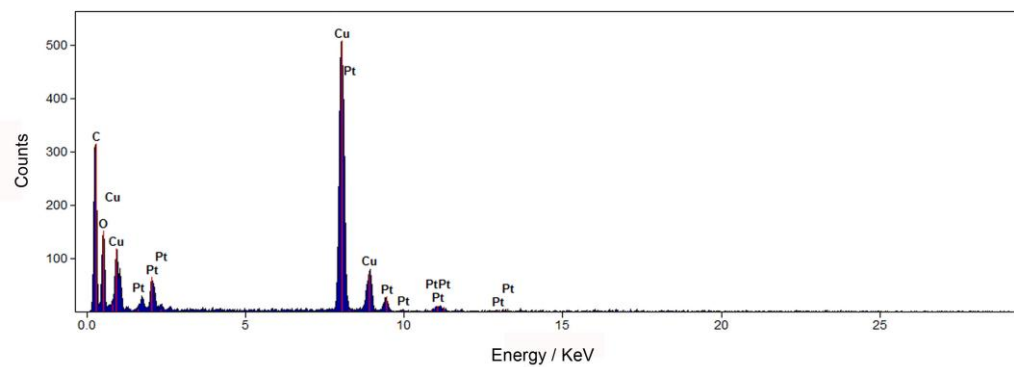

**Fig. S2** EDX spectrum of the Pt/G-Gel composite sheets released from Pt/G-Gel/NF-4.

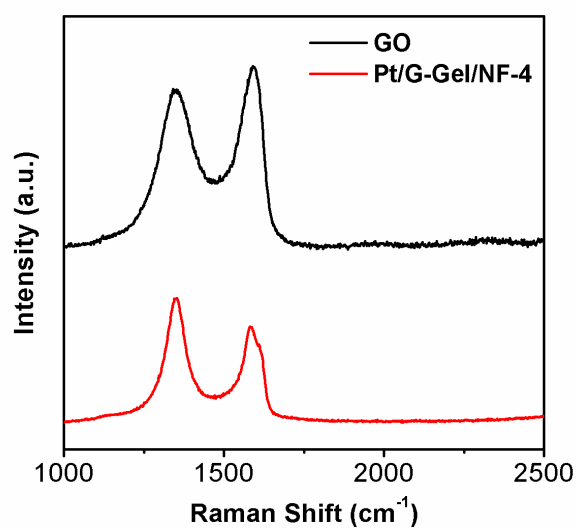

**Fig. S3** Raman spectrum of GO and Pt/G-Gel/NF-4 sample.

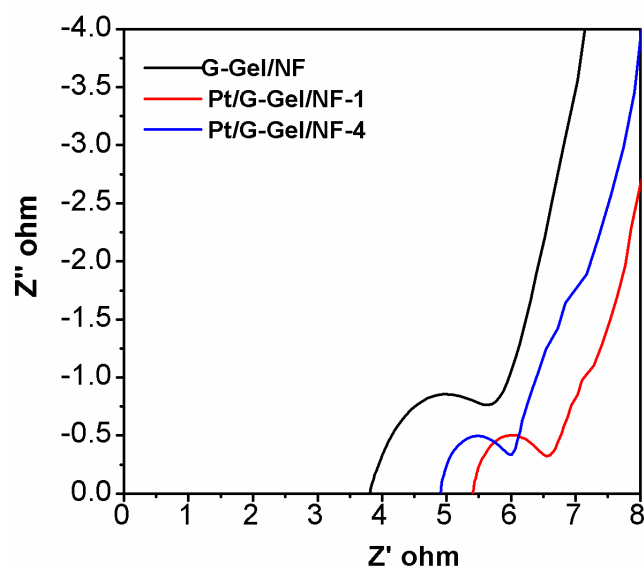

**Fig. S4** EIS curves of G-Gel/NF (black), Pt/G-Gel /NF-1 (blue), Pt/G-Gel/NF-4 (red) electrodes in 1 M CH<sub>3</sub>OH + 0.5 M KOH solution.

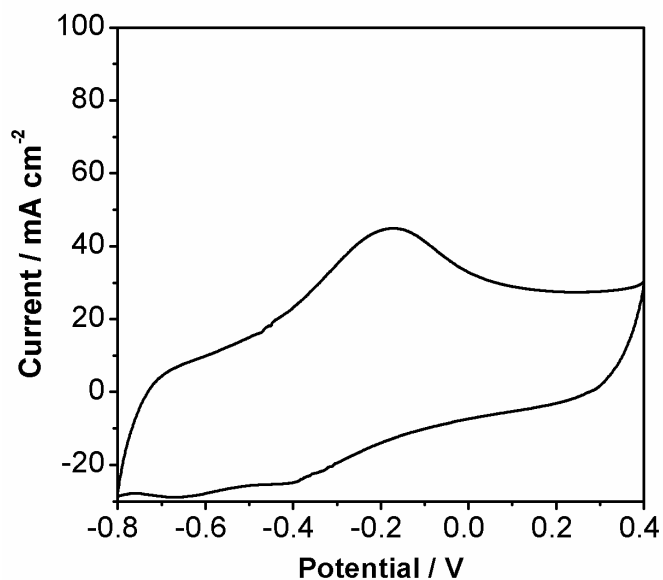

**Fig. S5** CV of Pt/G-Gel/NF-6 film in 1 M CH<sub>3</sub>OH + 0.5 M KOH solution at scan rate of 50 mV s<sup>-1</sup>.

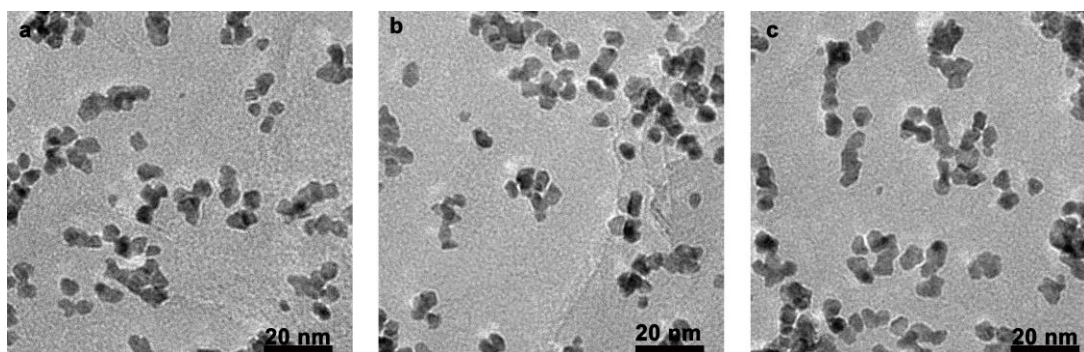

**Fig. S6** (a-c) HRTEM images of the Pt/G-Gel sheets released from Pt/G-Gel/NF-4 (a) before, (b) after 1h or (c) 3h of methanol oxidation at  $-0.3$  V.

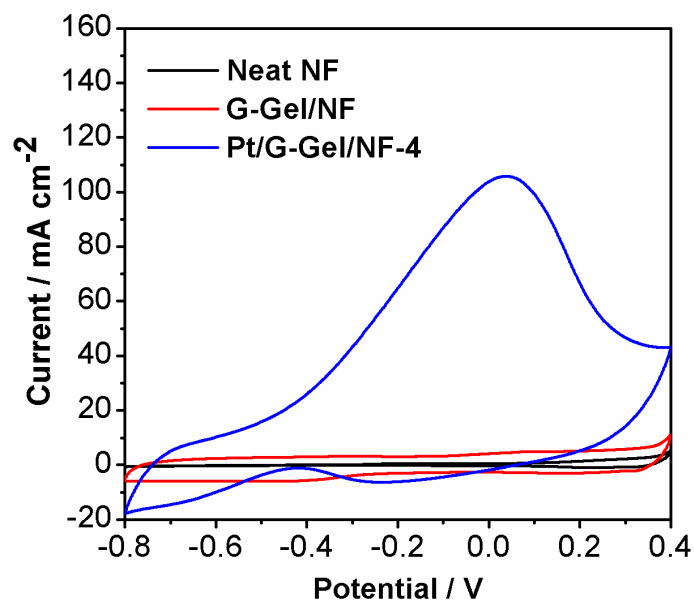

**Fig. S7** CVs of neat NF, G-Gel/NF and Pt/G-Gel/NF-4 films in 1 M  $\text{CH}_3\text{OH}$  + 0.5 M KOH solution at a scan rate of  $50 \text{ mV s}^{-1}$ .

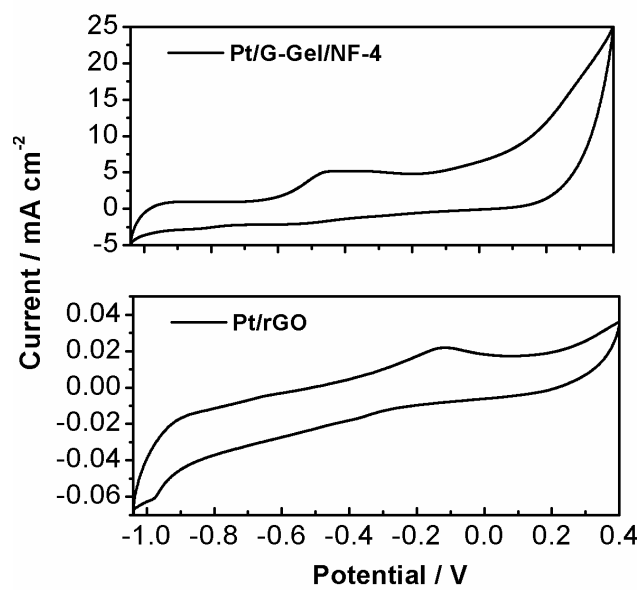

**Fig. S8** CO stripping CVs of Pt/G-Gel/NF-4 and Pt/rGO electrodes in a CO saturated 0.5 M KOH solution. The scan rate was 20 mV s<sup>-1</sup>.
